# Supplementary material for: Fine-tuned local coordination environment of Pt–N in nanocarbons for efficient propane dehydrogenation
Source: Royal Society of Chemistry journal article supplement (doi:10.1039/d3cp04215d), 2023-12-13
Supplement: d3cp04215d1.pdf [file d3cp04215d1.pdf]

## Supporting Information

### **Fine-tuned local coordination environment of Pt-N in nanocarbons for efficient propane dehydrogenation**

*Ziwei Zhai<sup>[a]</sup>, Bofeng Zhang<sup>[a]\*</sup>, Yutong Wang<sup>[a]</sup>, Guozhu Liu<sup>[a] [b] [c]\*</sup>*

[a] Key Laboratory for Green Chemical Technology of Ministry of Education, School of Chemical Engineering and Technology, Collaborative Innovation Center of Chemical Science and Engineering (Tianjin), Tianjin University, Tianjin 300072, China

[b] Haihe Laboratory of Sustainable Chemical Transformations, Tianjin 300192, China

[c] Zhejiang Institute of Tianjin University, Ningbo, Zhejiang, 315201, China

\* Corresponding author:

E-mail address: gliu@tju.edu.cn (Guozhu Liu)

zhangbofeng@tju.edu.cn (Bofeng Zhang)

## Equations:

The stability of Pt<sub>4</sub> clusters was calculated according to previous works.<sup>1-6</sup>

$$E_b = E_{Pt/Support} - E_{Pt} - E_{Support} \quad (S1)$$

where  $E_{Pt/Support}$  was the total energy of the most optimized configuration of Pt clusters anchored on support;  $E_{Pt}$  was the energy of the most stable Pt<sub>4</sub> clusters,  $E_{Support}$  was the optimized energies of pure support. The references were same for all systems, which were obtained from the geometric optimization.

The d-band center of Pt atoms was calculated by equations (S2):

$$\varepsilon_d = \frac{\int_{-\infty}^{\infty} n_d(\varepsilon) \varepsilon d\varepsilon}{\int_{-\infty}^{\infty} n_d(\varepsilon) d\varepsilon} \quad (S2)$$

Where  $\varepsilon$  was the electronic energy of d orbital of Pt atoms;  $n_d(\varepsilon)$  was the density of states of d electrons.

The TOF calculation was accorded with energetic span model and transition state theory, the equations were followed by the equation (S3-4):<sup>7, 8</sup>

$$TOF = \frac{k_B T}{h} e^{-\delta G/RT} \quad (S3)$$

$$\delta E = T_{TDTS} - T_{TDI} + \Delta G_r \quad (\Delta G_r > 0) \quad (S4)$$

Where  $k_B$  was the Boltzmann constant;  $h$  was the planck constant; T was the reaction temperature;  $\delta E$  was the energetic span of the whole reaction network; TDTS was the TOF-determining transition state and the TDI was the TOF-determining intermediate.

The Gibbs free energies were calculated by equation (S5):

$$\Delta G = \Delta E + \Delta E_{ZPE} - T\Delta S \quad (S5)$$

Where  $\Delta E_{ZPE}$ , T and  $\Delta S$  referred to the zero-point energy corrections, temperature (823K) and the entropy difference;  $\Delta E_{ZPE}$  was calculated by  $\Delta E_{ZPE} = 1/2 \sum \hbar \nu$ , in

which  $\nu$  was the vibrational frequency of the normal mode and  $h$  was the reduced Planck constant. As for the entropy correction, it was considered for the gas-phase species adsorption. The entropy change was ignored during the surface reaction.<sup>9</sup>

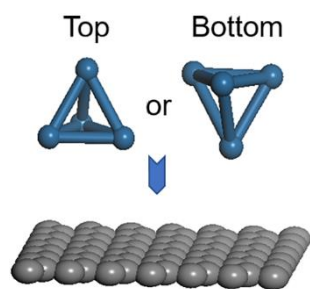

**Fig. S1.** The anchor mode of Pt clusters on the support.

**Table S1.** The comparison of the binding energies of Pt clusters between two anchor modes.

| Catalysts                      | Binding energies / eV |             |
|--------------------------------|-----------------------|-------------|
|                                | Top mode              | Bottom mode |
| Pt cluster anchored on GNCB    | -2.70                 | -1.60       |
| Pt cluster anchored on PyriNCB | -3.27                 | -4.33       |
| Pt cluster anchored on PyrrNCB | -6.82                 | -8.61       |

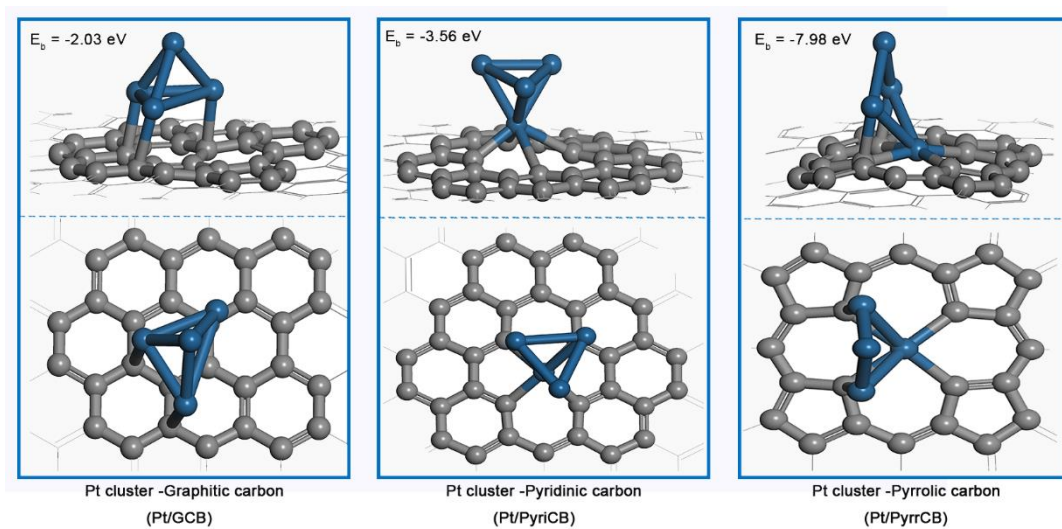

**Fig. S2.** The optimized configurations of Pt clusters on the non-doped carbons.

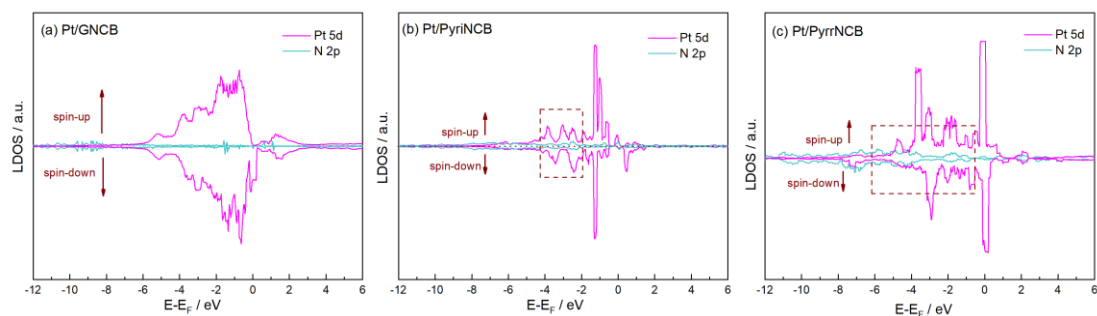

**Fig.S3.** The local density of states (LDOS) of Pt and N atoms of Pt/GNCB, Pt/PyriNCB and Pt/PyrrNCB.

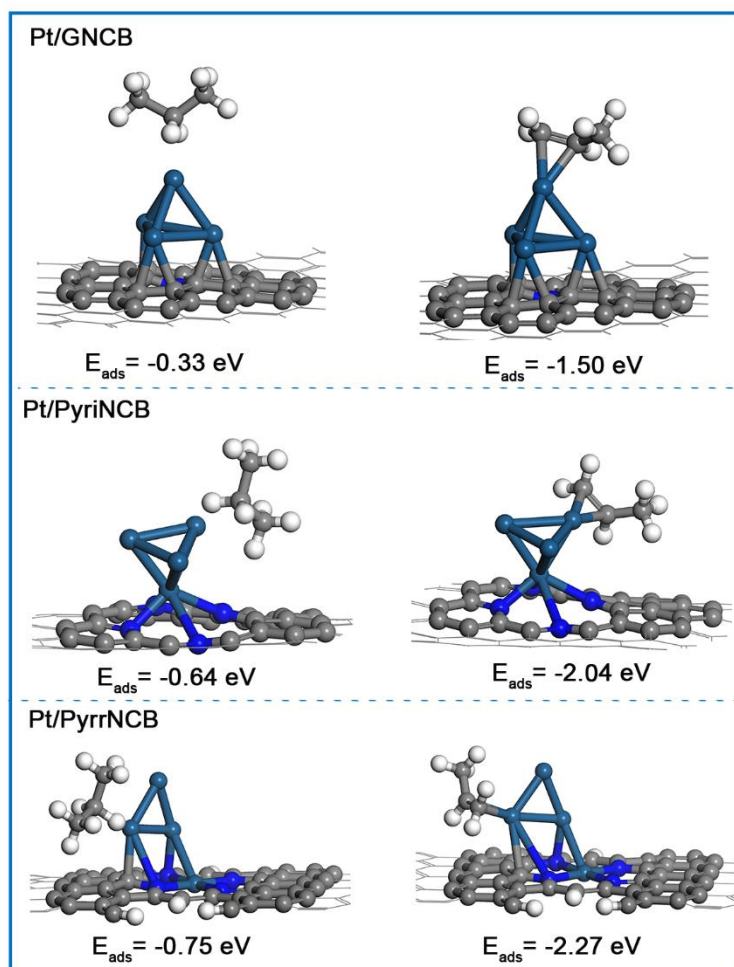

**Fig. S4.** The geometric configurations of propane and propylene adsorbed on the Pt/GNCB, Pt/PyriNCB and Pt/PyrrNCB.

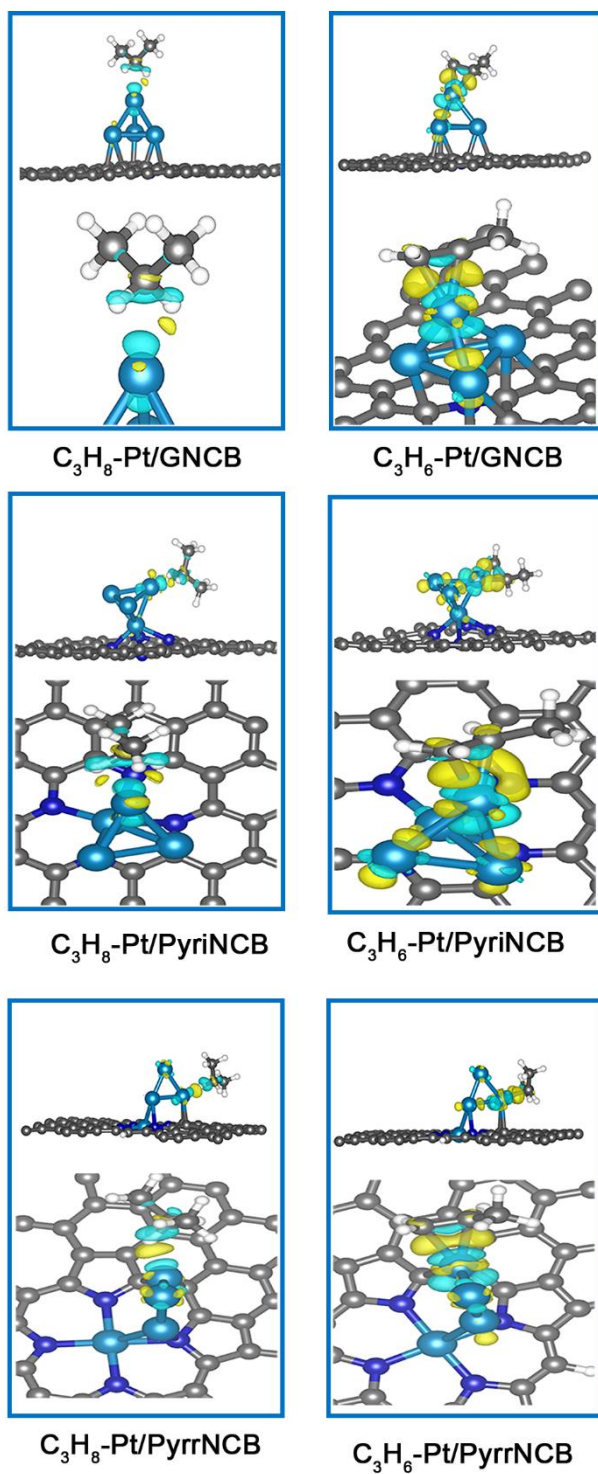

**Fig. S5.** Charge density difference of propane and propylene adsorbed on the Pt/GNCB, Pt/PyriNCB and Pt/PyrrNCB.

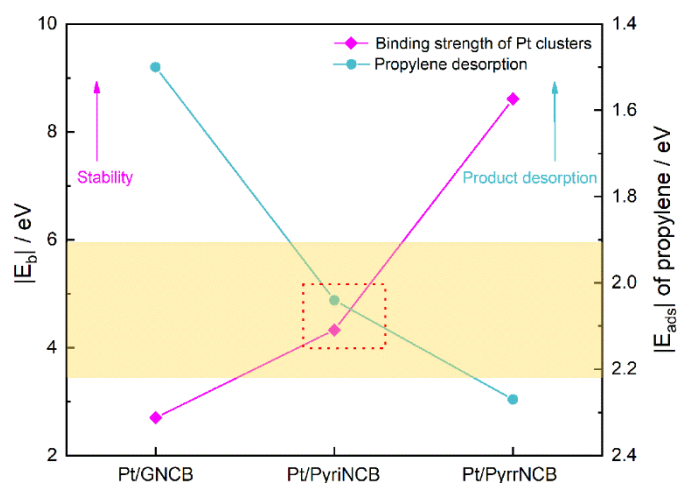

**Fig. S6.** The binding strength of Pt clusters and adsorption energies of propylene in Pt/GNCB, Pt/PyriNCB and Pt/PyrrNCB.

As shown in Fig. S6, the binding strength of Pt clusters in Pt/PyrrNCB was the strongest, and the followings were Pt/PyriNCB and Pt/GNCB. However, taking the product desorption into consideration, the most excellent ability to desorb propylene was belonged to Pt/GNCB. Propylene would occupy the catalytic surface of Pt/PyrrNCB and inhibit the catalytic selectivity, owing to its high adsorption energies. Therefore, pyridinic N in nanaocarbons has the moderate ability to anchor Pt clusters and guarantee the product desorption as compared with graphitic N and pyrrolic N.



**Table S2.** Gibbs free energies ( $\Delta G$ ) and corresponding activation barriers ( $G_a$ ) of elementary steps on the N-doped carbons.

| Reactions                                                                                              | Pt/GNCB           |                        | Pt/PyriNCB        |                        | Pt/PyrrNCB        |                        |
|--------------------------------------------------------------------------------------------------------|-------------------|------------------------|-------------------|------------------------|-------------------|------------------------|
|                                                                                                        | $G_a/ \text{ eV}$ | $\Delta G/ \text{ eV}$ | $G_a/ \text{ eV}$ | $\Delta G/ \text{ eV}$ | $G_a/ \text{ eV}$ | $\Delta G/ \text{ eV}$ |
| $\text{CH}_3\text{CH}_2\text{CH}_3^* \rightarrow \text{CH}_3\text{CHCH}_3^* + \text{H}^*$              | 0.81              | 0.11                   | 0.16              | -0.39                  | 0.22              | -0.19                  |
| $\text{CH}_3\text{CH}_2\text{CH}_3^* \rightarrow \text{CH}_3\text{CH}_2\text{CH}_2^* + \text{H}^*$     | 1.04              | 0.37                   | 0.49              | 0.66                   | 0.24              | 0.15                   |
| $\text{CH}_3\text{CHCH}_3^* + \text{H}^* \rightarrow \text{CH}_3\text{CH}=\text{CH}_2^* + 2\text{H}^*$ | 0.41              | -0.14                  | 0.08              | -0.57                  | 0.10              | -0.92                  |
| $\text{CH}_3\text{CH}=\text{CH}_2^* \rightarrow \text{CH}_3\text{C}=\text{CH}_2^* + \text{H}^*$        | 1.15              | 0.75                   | 1.07              | 0.24                   | 0.61              | -0.06                  |
| $\text{CH}_3\text{CH}=\text{CH}_2^* \rightarrow \text{CH}_3\text{CH}=\text{CH}^* + \text{H}^*$         | 0.87              | 0.89                   | 1.25              | 1.34                   | 1.05              | 0.65                   |
| $\text{CH}_3\text{CH}_2\text{CH}_3^* \rightarrow \text{CH}_3^* + \text{CH}_2\text{CH}_3^*$             | 1.25              | 0.48                   | 1.39              | 0.82                   | 1.14              | 0.34                   |

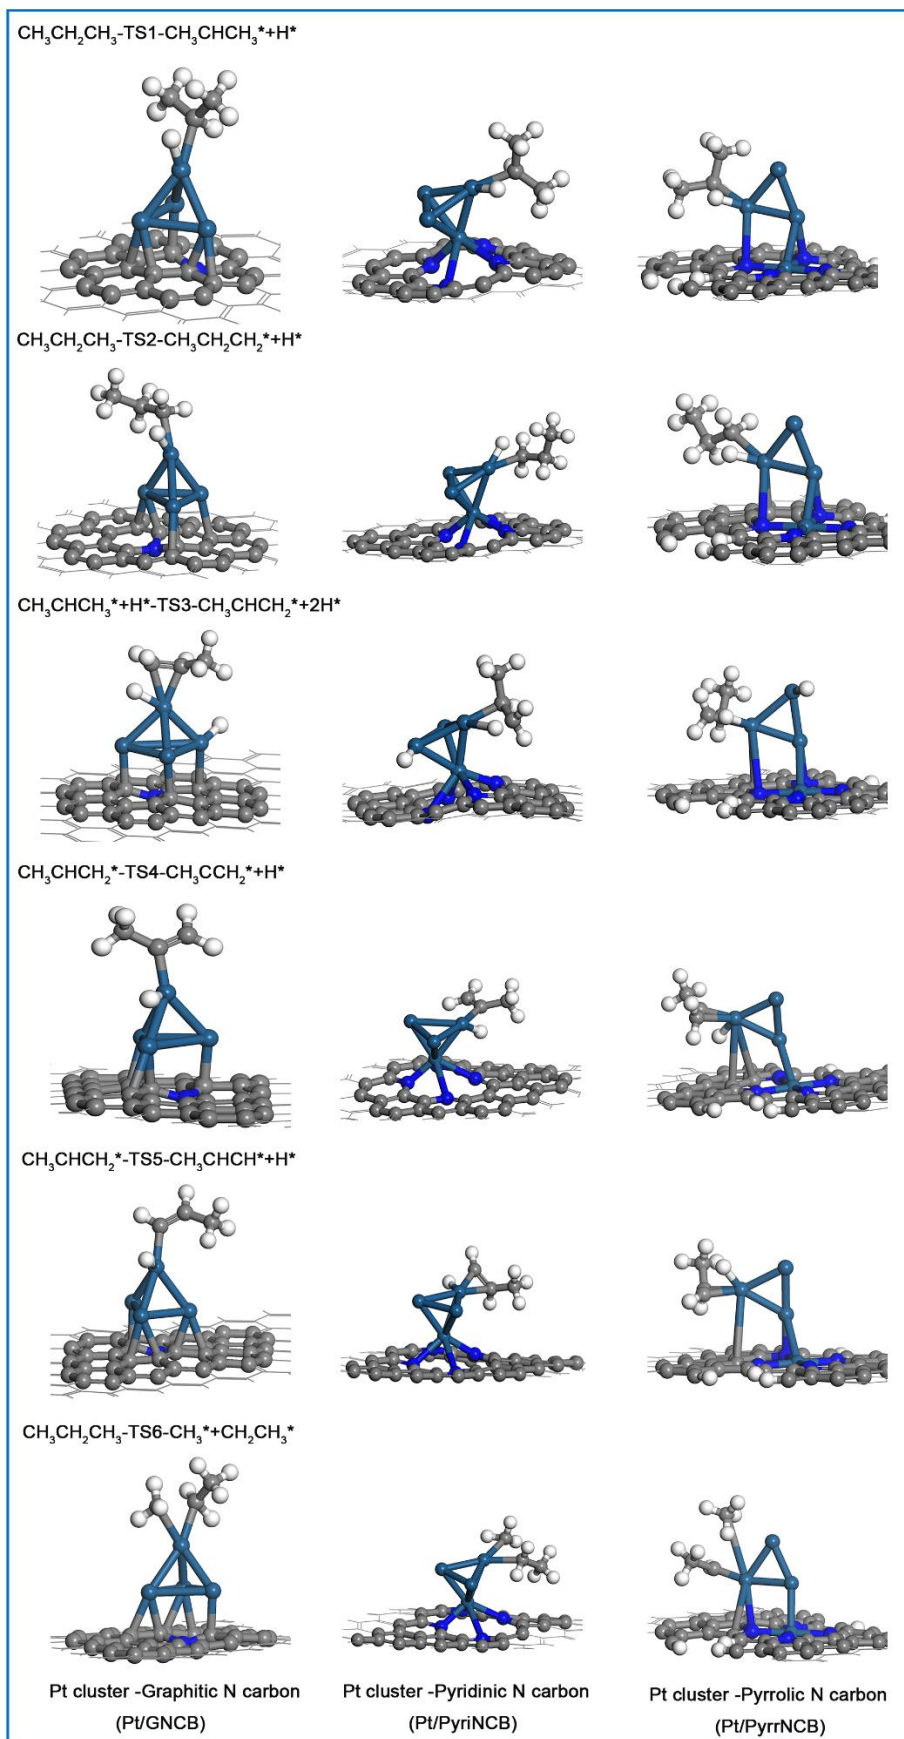

**Fig. S7.** The geometric configurations of transition states in PDH.

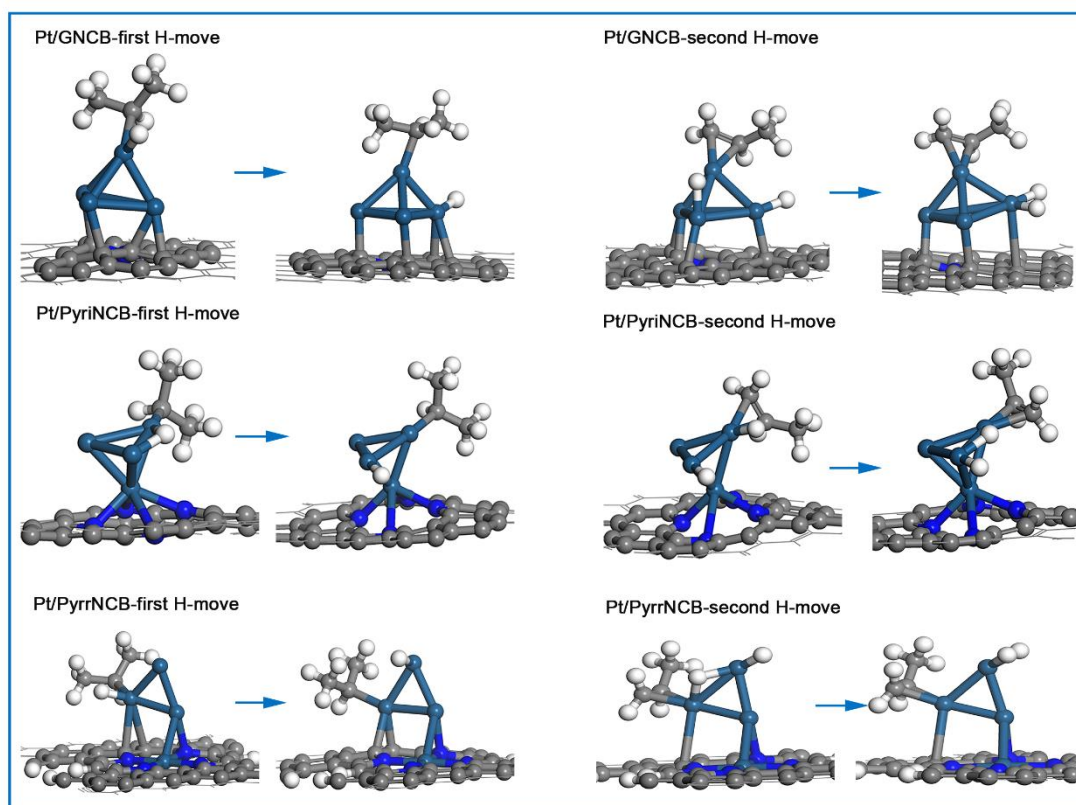

**Fig. S8.** H-move pathways after dehydrogenation in Pt/GNCB, Pt/PyriNCB and Pt/PyrrNCB.

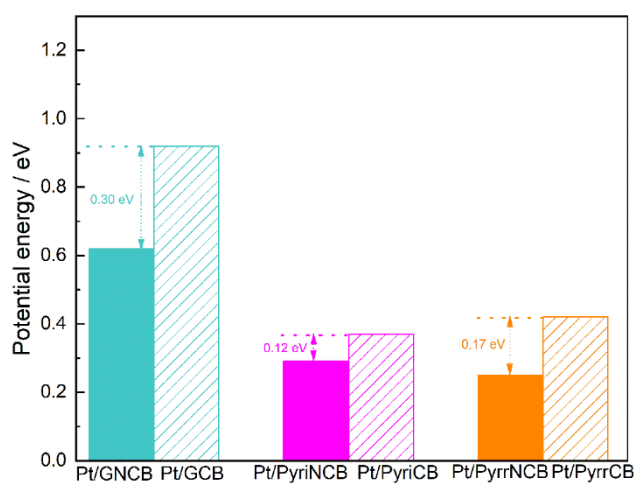

**Fig. S9.** The comparison of activation barriers of RDS in Pt clusters anchored on N-doped carbons and non-doped carbons

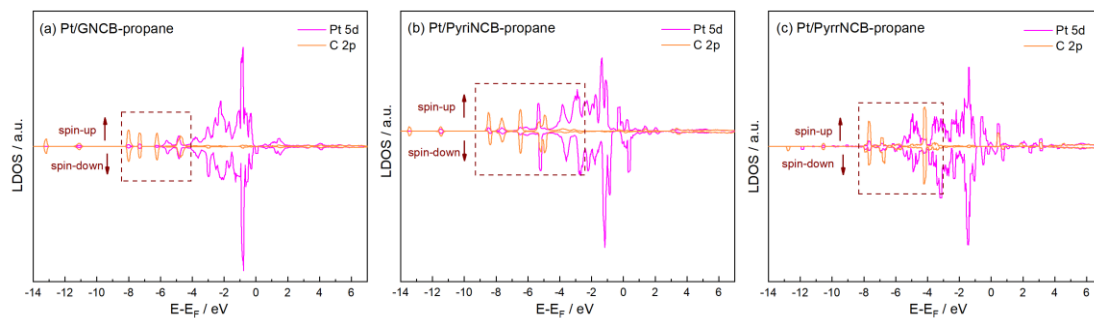

**Fig. S10.** The local density of states (LDOS) of Pt atoms in catalysts and C atoms in propane.

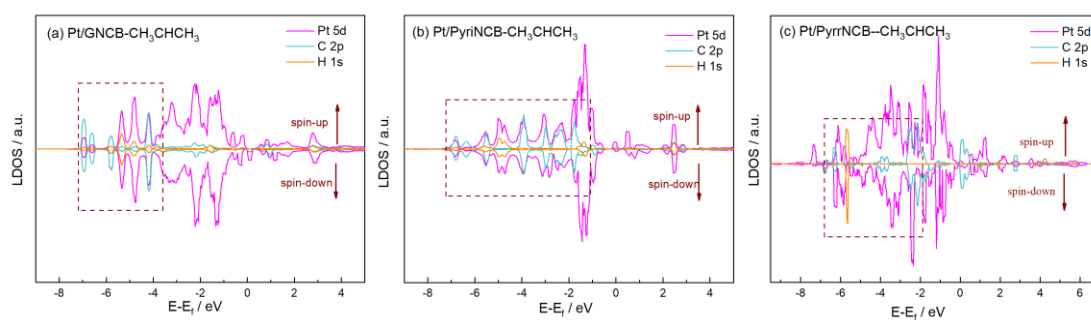

**Fig. S11.** The local density of states (LDOS) of Pt, C and H atoms of catalysts adsorbed with  $\text{CH}_3\text{CHCH}_3$ .

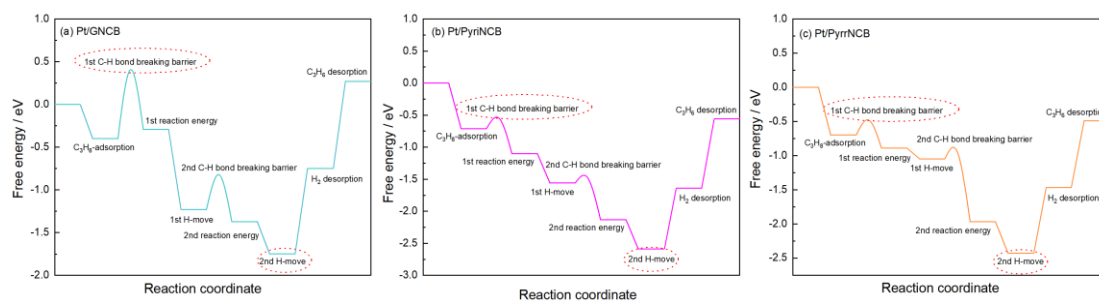

**Fig. S12.** TDTS and TDI in the whole energy profile of Pt/GNCB, Pt/PyriNCB and Pt/PyrrNCB.

## References:

1. J. W. Ma, A. Habrioux, Y. Luo, G. Ramos-Sanchez, L. Calvillo, G. Granozzi, P. B. Balbuena and N. Alonso-Vante, *J Mater Chem A*, 2015, **3**, 11891-11904.
2. X. B. Bao, Y. T. Gong, Y. Z. Chen, H. Zhang, Z. Wang, S. J. Mao, L. Xie, Z. Jiang and Y. Wang, *J Mater Chem A*, 2019, **7**, 15364-15370.
3. I. Fampiou and A. Ramasubramaniam, *J Phys Chem C*, 2012, **116**, 6543-6555.
4. J. G. Wang, Y. A. Lv, X. N. Li and M. D. Dong, *J Phys Chem C*, 2009, **113**, 890-893.
5. H. Zhou, X. L. Chen, L. Wang, X. Zhong, G. L. Zhuang, X. N. Li, D. H. Mei and J. G. Wang, *Phys Chem Chem Phys*, 2015, **17**, 24420-24426.
6. X. Y. Sun, J. H. Xue, Y. Ren, X. Y. Li, L. J. Zhou, B. Li and Z. Zhao, *Chinese J Chem*, 2021, **39**, 661-665.
7. S. Kozuch and S. Shaik, *Accounts Chem Res*, 2011, **44**, 101-110.
8. S. Kozuch, C. Amatore, A. Jutand and S. Shaik, *Organometallics*, 2005, **24**, 2319–2330.
9. S. Zha, G. Sun, T. Wu, J. Zhao, Z. J. Zhao and J. Gong, *Chem Sci*, 2018, **9**, 3925-3931.
